# Supplementary material
Source: PubMed Central journal article supplement (PMC7100044)
Supplement: EMS86070-supplement-_Supporting_Information.pdf [file EMS86070-supplement-_Supporting_Information.pdf]

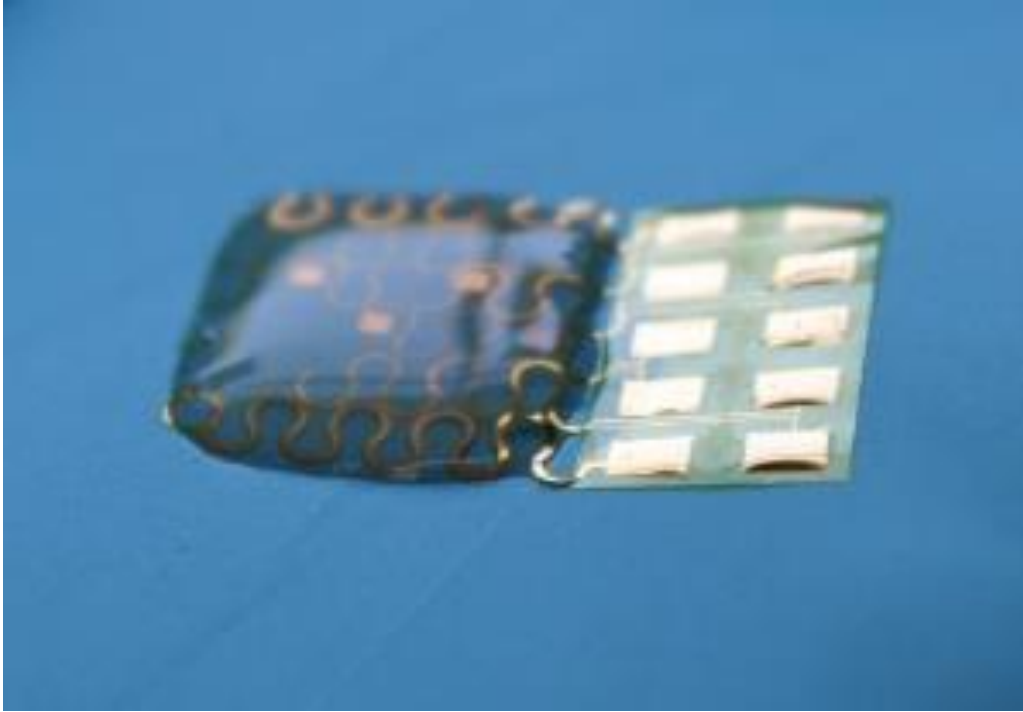

**Supplementary figure 1.** Macro image of the freestanding device embedded within the thermoresponsive omentum hydrogel.

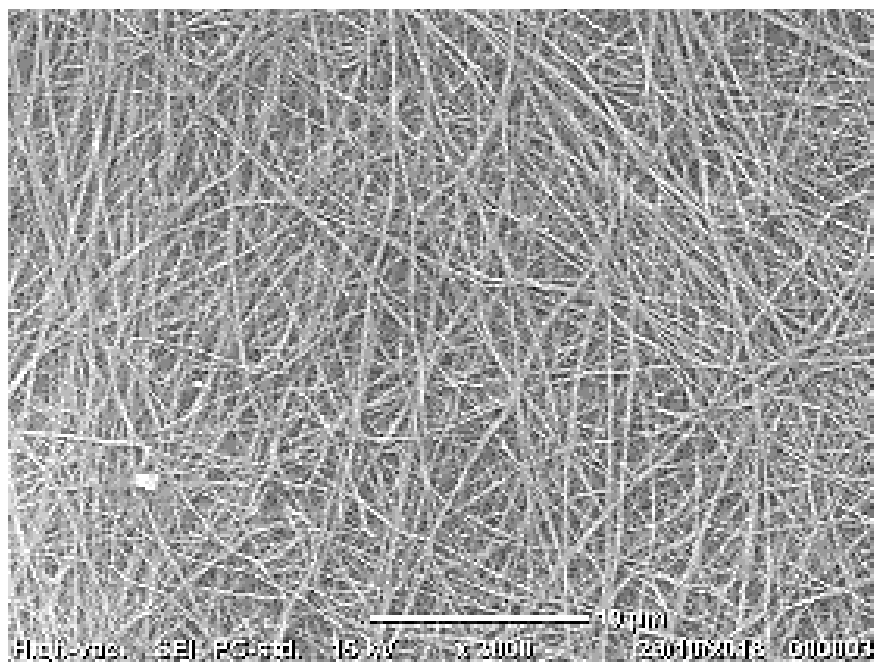

**Supplementary figure 2.** Scanning electron micrograph of the collagenous fibers composing the thermoresponsive hydrogel in figure S1.

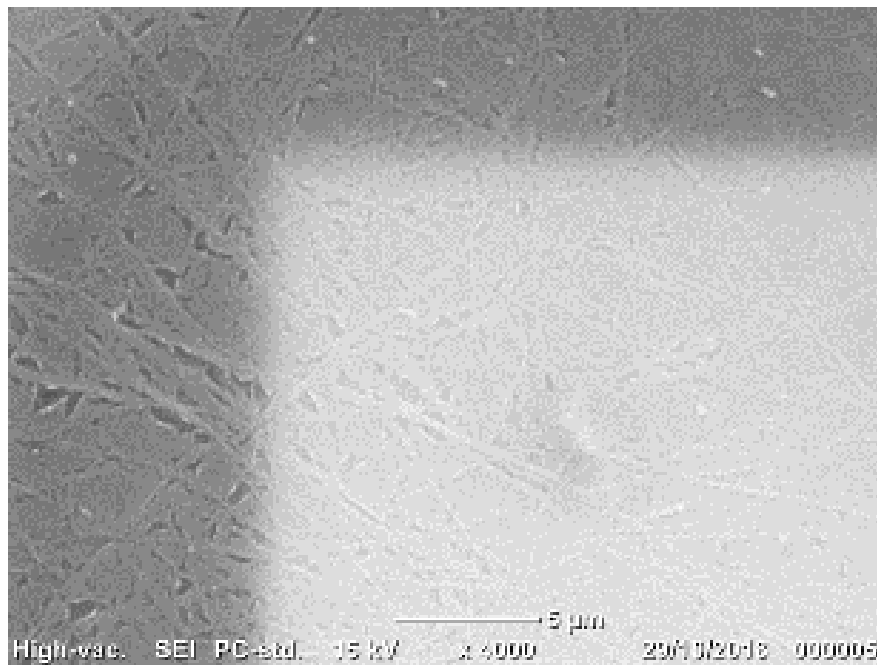

**Supplementary figure 3.** Scanning electron micrograph showing a large drug release electrode embedded within the thermoresponsive hydrogel.

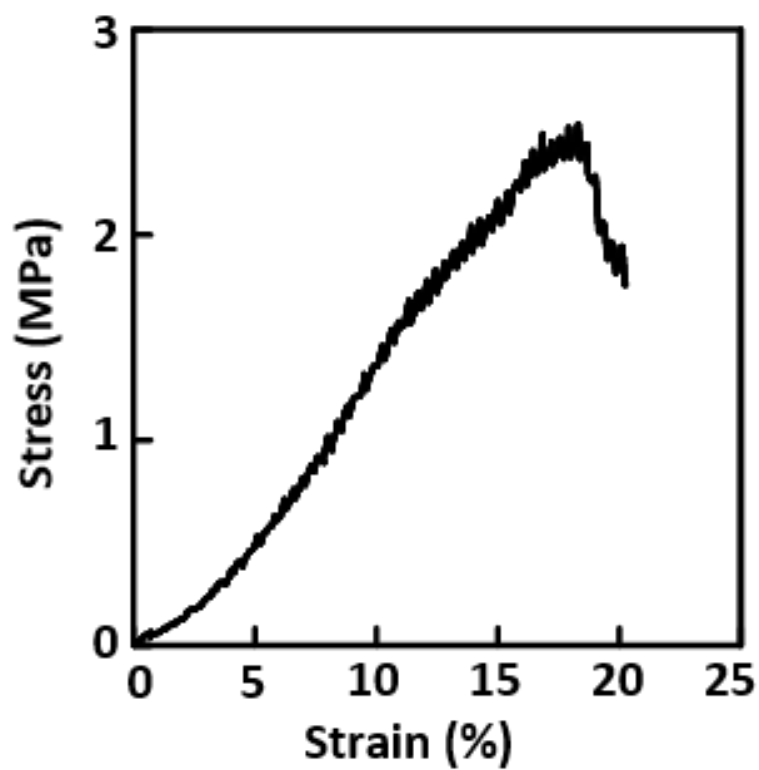

**Supplementary figure 4.** Stress-strain curve of the device embedded within a freeze-dried thermoresponsive hydrogel.

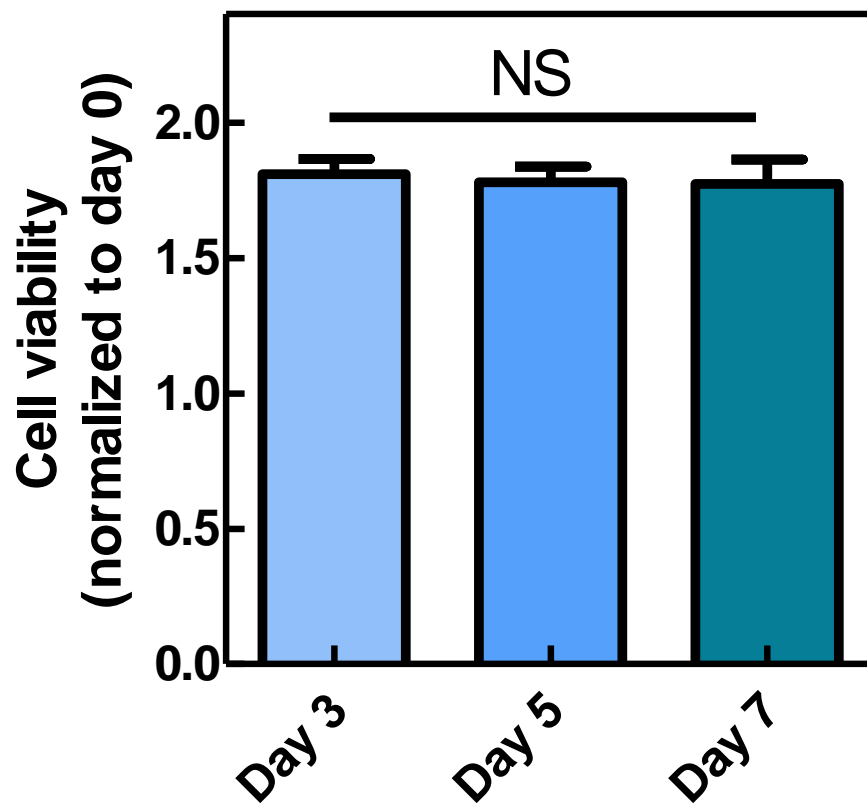

**Supplementary figure 5.** Cell viability as determined by a Prestoblu<sup>®</sup> metabolic activity assay. NS, not significant. Error bars represent the standard deviation. (n=10)
